# Supplementary material for: Oxidative Stress in Caenorhabditis elegans: Protective Effects of Spartin
Source: PubMed Central journal article supplement (PMC4482654; doi:10.1371/journal.pone.0130455), 2015-06-26
Supplement: pone.0130455.s004.pdf [file pone.0130455.s004.pdf]

## Supplementary Table 2

| Strains                                         | Median Survival | P value (Kaplan-Meier) | Figure no. | No. of death observed/no. of total animals |
|-------------------------------------------------|-----------------|------------------------|------------|--------------------------------------------|
| WT: Ex[H20::gfp]                                | n/a             | <0.000000001           | 4B         | 21/161                                     |
| spg-20(tm5514):<br>Ex[H20::gfp]                 | n/a             | Reference              |            | 85/198                                     |
| spg-20(tm5514): Ex[H20::gfp<br>+ spg-20 fosmid] | n/a             | <0.0001                |            | 21/116                                     |
